# Supplementary material for: Two novel, tightly linked, and rapidly evolving genes underlie Aedes aegypti mosquito reproductive resilience during drought
Source: eLife. 2023 Feb 6;12:e80489. doi: 10.7554/eLife.80489 (PMC10076016; doi:10.7554/eLife.80489)
Supplement: Figure 6—figure supplement 1—source data 1. [file elife-80489-fig6-figsupp1-data1.xlsx]

## Sheet: Sheet1
PCR primer combinations		PCR product size with indicated DNA template genotype
		(+/+)	(+/deedum)	(deedum/deedum)
tweedledee-F	tweedledee-R	1143 bp	1143 bp	No product
tweedledum-F	tweedledum-R	751 bp	751 bp	No product
tweedledee-F	tweedledum-R	Too large to amplify	867 bp	867 bp
